# Supplementary material for: NEK10 kinase ablation affects mitochondrial morphology, function and protein phosphorylation status
Source: PubMed Central journal article supplement — Proteome Sci. 2024 Oct 8;22:8. doi: 10.1186/s12953-024-00234-z (PMC11460017; doi:10.1186/s12953-024-00234-z), 2024-10-08
Supplement: 12953_2024_234_MOESM1_ESM.pdf [file 12953_2024_234_MOESM1_ESM.pdf]

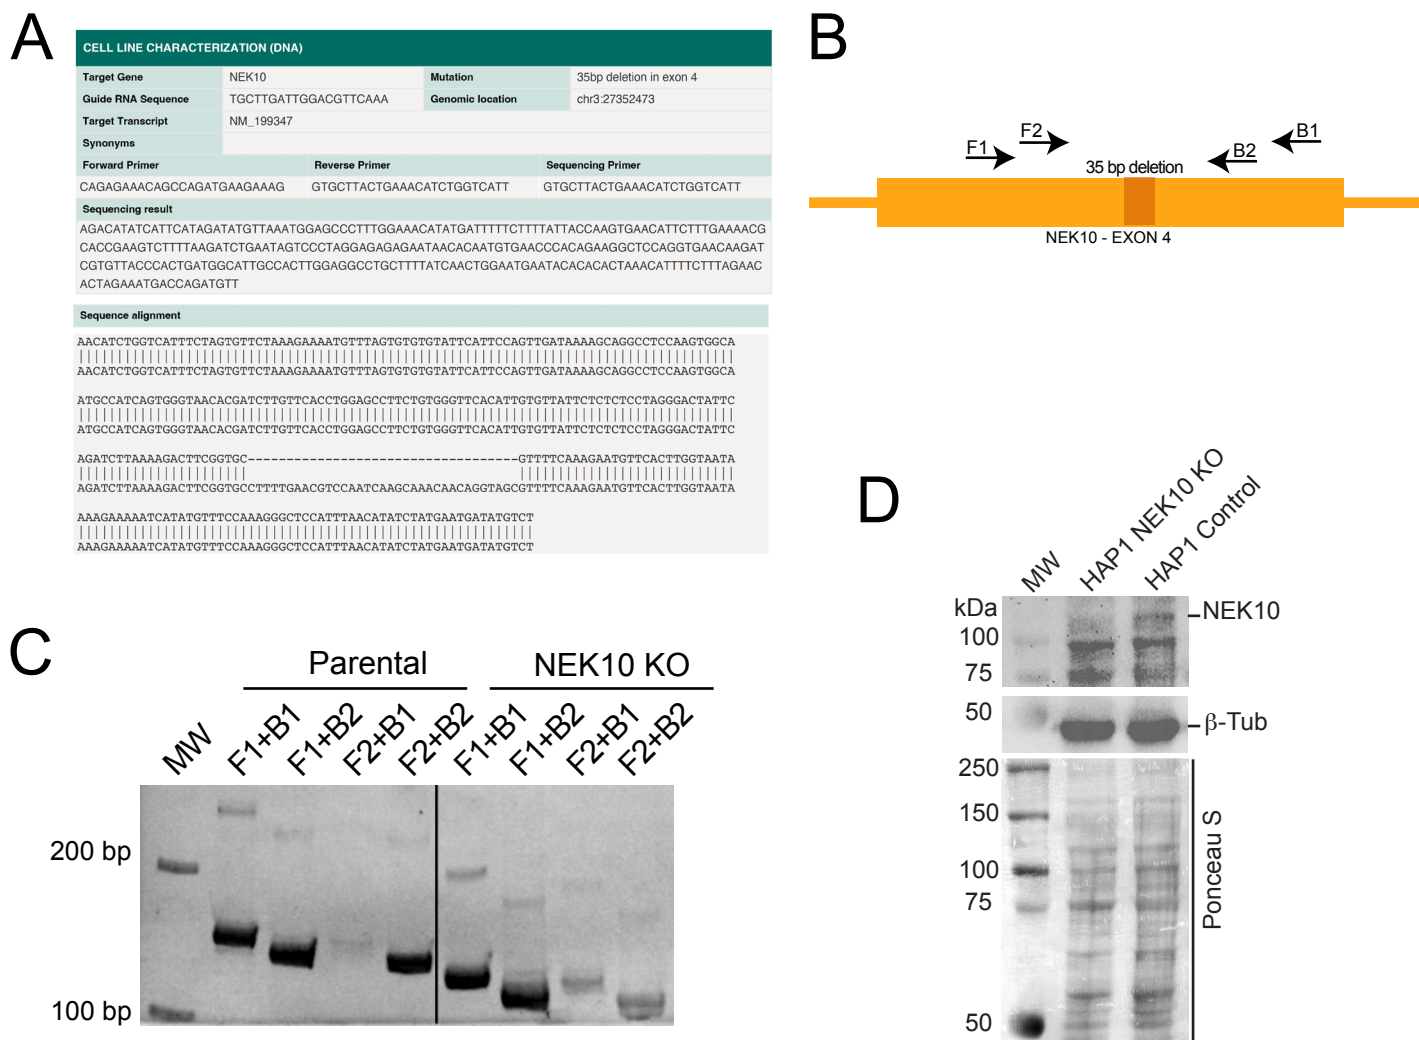

**Supplemental Figure S1 - Genetic characterization of NEK10 knockout cells.** A) NEK10 gene sequencing and gene alignment of Parental and NEK10 KO HAP1 cells (from Horizon web site). NEK10 KO cells have a 35 bp deletion in exon 4. B) Location of diagnostic primer in NEK10 exon 4. C) 10% polyacrylamide gel of PCR amplification of parental and NEK10 KO DNA using the primers depicted in panel B. Lane 1 shows the molecular marker DNA – (100 bp Low Ladder Thermo Scientific). Amplicons of NEK10 exon 4 are approximately 150 bp for the Parental line, but 35 bp shorter for the NEK10 KO cells. Each lane shows a different combination of oligonucleotide primers (Forwards F1 and F2 with Reverse B1 and B2). Non-template controls showed no amplification (not shown). D) Western blot of homogenates of HAP1 control and NEK10 KO lines. An antibody generated in goats by Santa Cruz Biotechnology (cat#sc-103067 NEK10 (D-17)) was used to detect the 133 KD band, which was absent in the KO line.

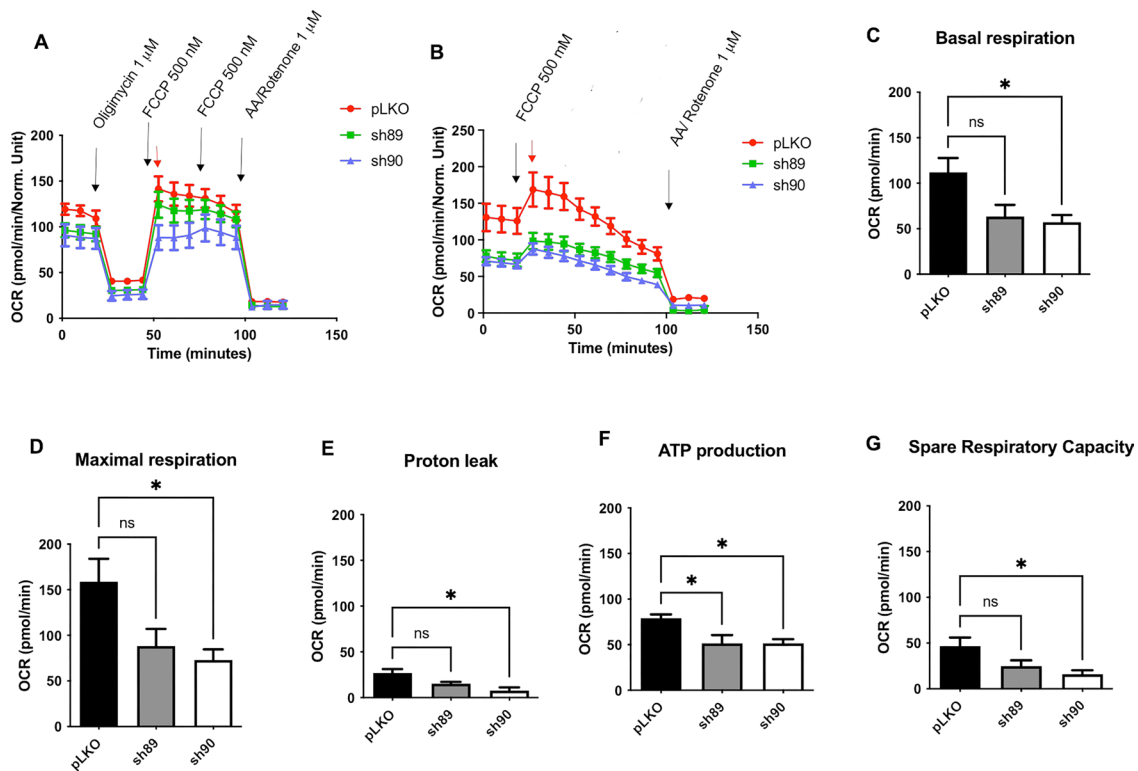

**Supplemental Figure S2 – Mitochondrial respiration analysis of control (pLKO), and NEK10-knockdown cells (sh89 e sh90).** The graphs in figures A and B show the OCR (oxygen consumption rate) during mitochondrial respiration. The pLKO cells are shown in red, sh89 cells in green; sh90 cells in the blue line. The black arrows show the time when the inhibitors were added with their respective concentration. The red arrow indicates maximal respiration. C – The graph shows the Basal Respiration of pLKO, sh89, and sh90 cells. In D- Maximal respiration. E- Proton Leak. F- ATP production linked to OCR. G- Spare Respiratory Capacity. All the graphs show the results of 4 independent experiments (n=4) in quadruplicate (4 different cell passages). The data was obtained with Seahorse XFe24 Analyzer – Agilent equipment and analyzed at Seahorse Wave desktop software 35. The statistical analyses were performed with GraphPad Prism 47 and used a one-way ANOVA test followed by the post hoc Dunnett test, where \* =  $p < 0.05$ . The graphs are shown in Mean  $\pm$  SD.

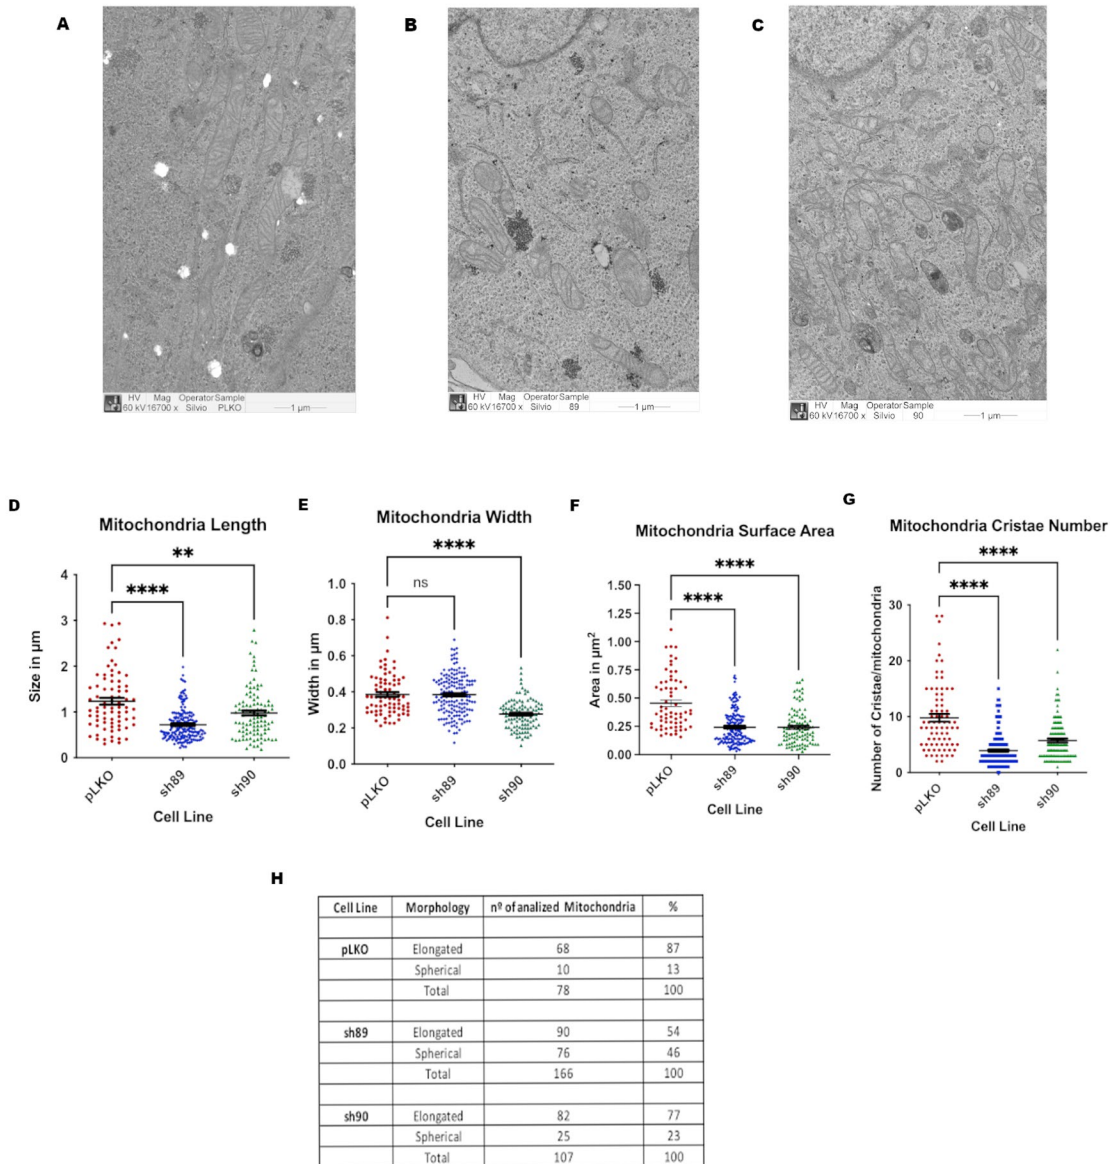

**Supplemental Figure S3 – Morphology analysis of the control (pLKO), and NEK10-depleted cells (sh89 e sh90) by Transmission Electron Microscopy (TEM).** In A are shown the representative picture of the mitochondria of the pLKO; B - sh89; and C - sh90 cells. A total of 78 mitochondria from pLKO cells, 166 mitochondria from sh89 cells, and 107 mitochondria from sh90 cells were analyzed. The scale bar is 1µm. In total, 15 images were taken for pLKO cells; 17 images for sh89 cells; and 18 images for sh90 cells. In D – The graph shows the analysis of the mitochondrial length (Size in µm); E- mitochondrial width (Width in µm); F- mitochondrial area (Area in µm<sup>2</sup>); and G - number of mitochondrial cristae per mitochondrion. The mitochondrion was classified based on their mitochondrial morphology: spherical (<6 µm), or elongated (> = 6 µm) <sup>11</sup> (Figure H). Mitochondrial morphology analysis was performed using Image J2 software <sup>33</sup>. The statistical analyses were performed with GraphPad Prism <sup>47</sup>, and the one-way ANOVA tests followed Tukey's test was employed, where p-value <0.05 = \*, p-value <0.01 = \*\*, p-value < 0.001 \*\*\*, and p-value < 0.0001= \*\*\*\*. The graphs are shown in Mean with SD.

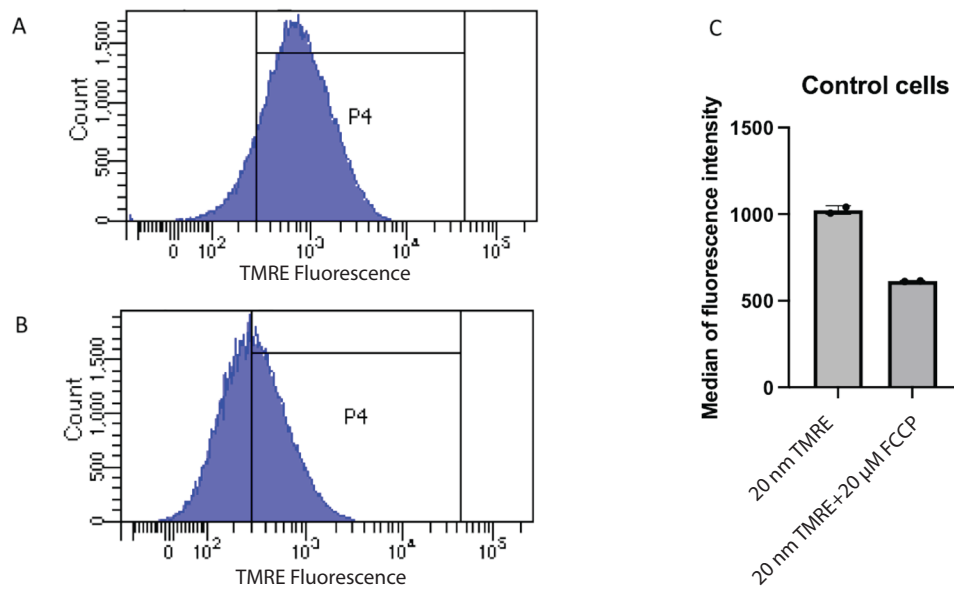

**Supplemental Figure S4. FCCP reduces fluorescence of TMRM/TMRE in the concentrations used (20 nM).** HEK293T cells were incubated with TMRE 20 nM for 30 minutes and analyzed in an BD FACS Aria TM flow analyzer (panel A). FCCP was added at 20  $\mu$ M for mitochondrial depolarization before measurements (panel B). Quantification shown in panel C.

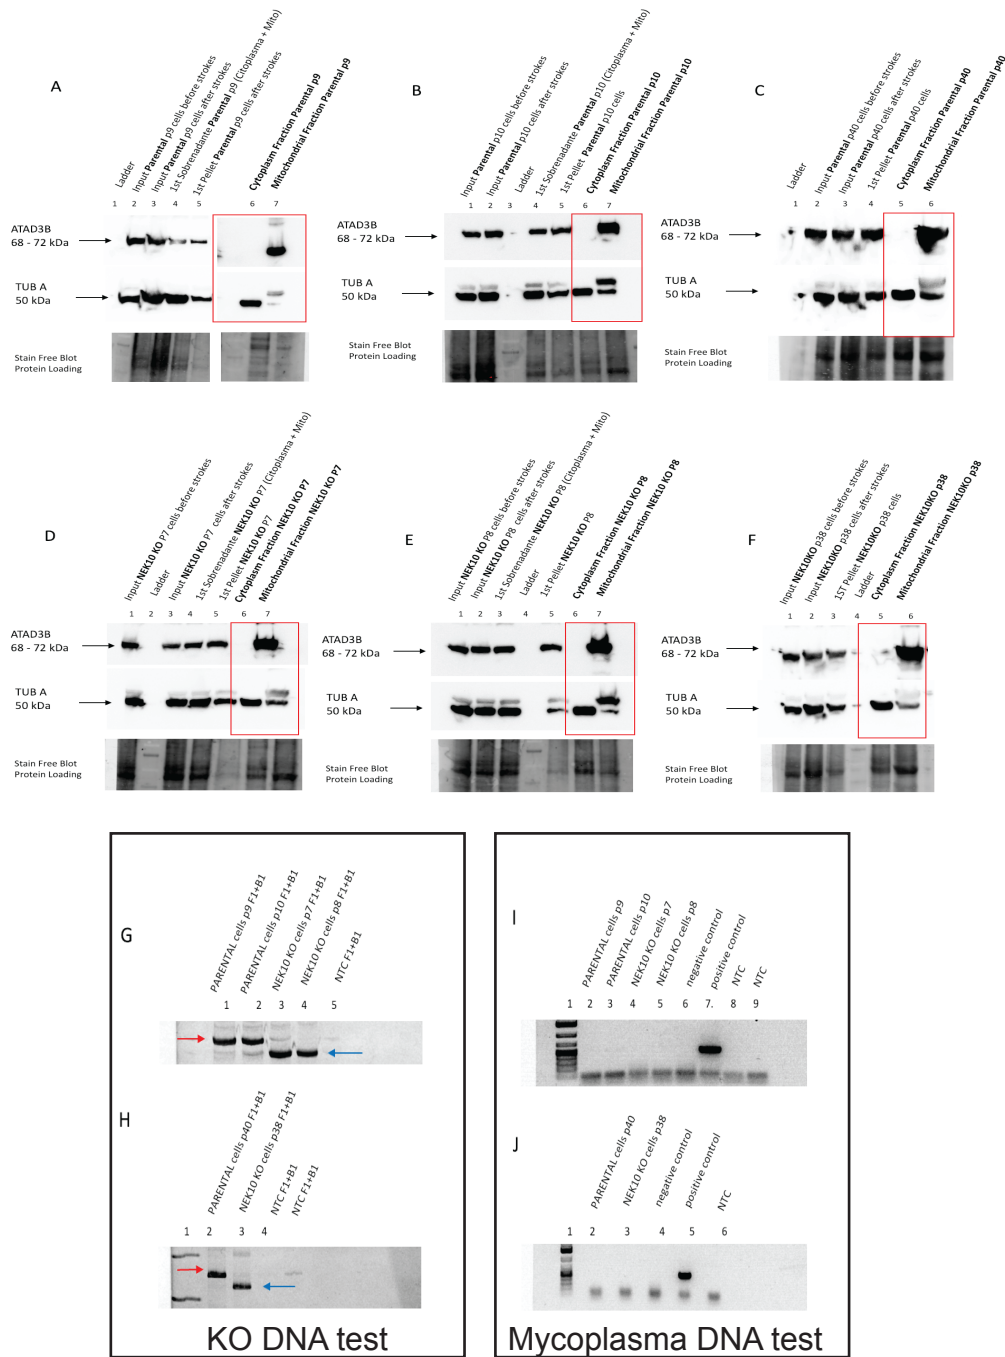

**Supplemental Figure S5- Composition analysis of mitochondrial fractions of Parental cells and NEK10 KO cells, NEK10 knockout, and PCR mycoplasma analysis.** In A – Mitochondrial fractionation of Parental cells passage 9 (p9); B- Mitochondrial fractionation of Parental cells passage 10 (p10) and C- Mitochondrial fractionation of Parental cells passage 40 (p40). In D – Mitochondrial fractionation of NEK10 KO cells passage 7 (p7); E- Mitochondrial fractionation of NEK10 KO cells passage 8 (p8) and F- Mitochondrial fractionation of NEK10 KO cells passage 38 (p38). Western blots were analyzed with anti-ATAD3 antibodies (1:1000) in the upper panels and anti-Tubulin A (1:1000) in the middle panels, and total protein analysis was detected by the Stain-Free Blot technique Bio-Rad. The molecular protein marker used in the blotting westerns was Thermo Scientific Spectra™ Multicolor Broad Range Protein Ladder. Figures G and H are shown a 12% polyacrylamide with amplified bands of the Parental cells (p9, p10, and p40) of approximately 150 bp (indicated by the red arrow) and of the NEK10 KO cells (p7, p9, and p38) of approximately 115 bp (indicated by the blue arrow). In I and J, the 1% agarose gel shows the negative mycoplasma test of the Parental cells (p9, p10, and p40) and of the NEK10 KO cells (p7, p9, and p38).

**A**

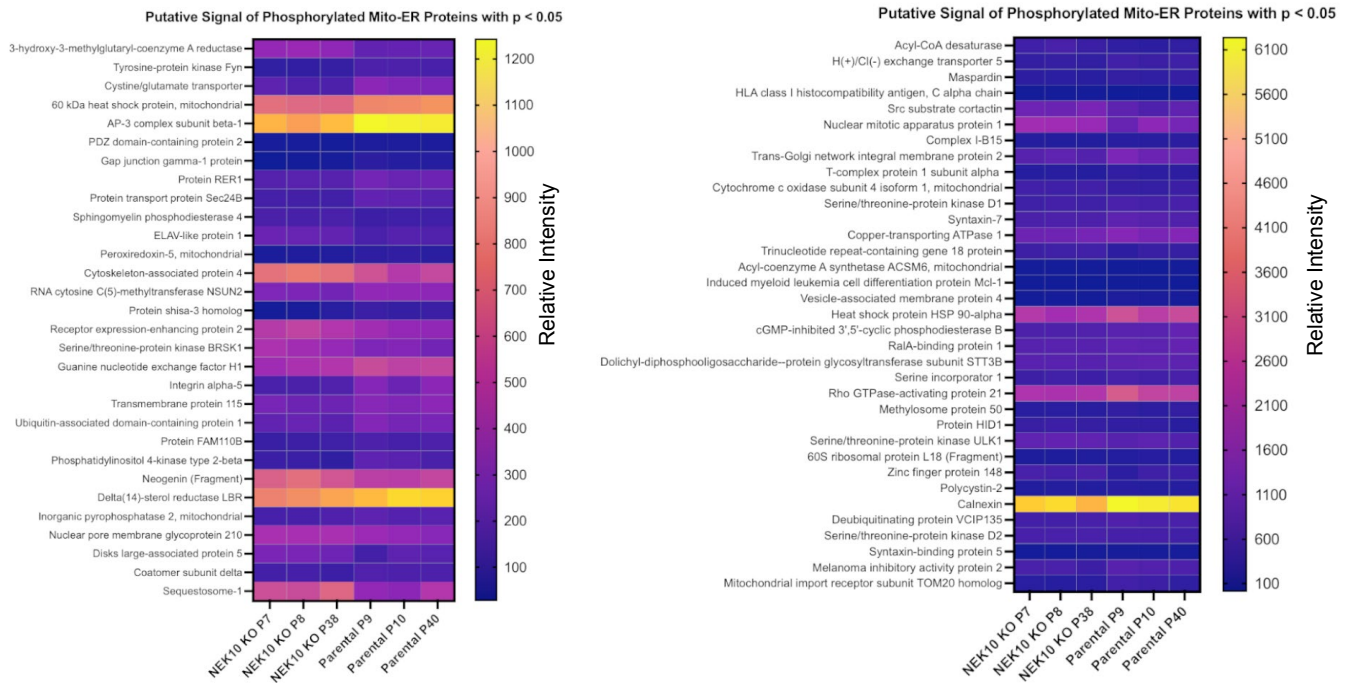

**B**

**Putative Signal of Phosphorylated Mito-ER proteins**

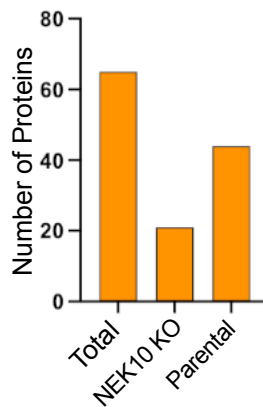

**Supplemental Figure S6 - Differential putative signal of phosphorylated mitochondrial and ER proteins from Parental and NEK10 KO cells.** A) Heat map of the 65 phosphorylated putative signals of mitochondrial and ER proteins from NEK10 KO (p7, p8, p38) and Parental cells (p9, p10, p40). The putative signal found for each phosphorylated protein, with a p-value  $< 0.05$ , is shown. B) Significantly different phosphorylation. 44 (68%) of a total of 65 proteins have a putative phosphorylation signal higher in Parental cells than in NEK10 KO cells. And 21 proteins (32%) have a higher putative phosphorylation signal in NEK10 KO cells compared to Parental cells.

**Supplemental Figure S7. Putative signal of mitochondrial/ER-related proteins altered in NEK 10 KO cells.**

**All significantly altered propteins (p<0.05) in NEK10 KO (relative to parental) crude mitochondria are shown.**

**Each NEK10 KO passage was normalized to its respective Parental control signal.**

| Gene Symbol   | Accession  | Ratio (KO/Parent) | p-value   | Gene Symbol | Accession  | Ratio (KO/Parent) | p-value    |
|---------------|------------|-------------------|-----------|-------------|------------|-------------------|------------|
| MAP1LC3B      | Q9GZQ8     | 1.896750524       | 8.425E-05 | NDUF54      | O43181     | 0.768454039       | 0.01604531 |
| ATP7A         | Q04656     | 0.876484822       | 0.000103  | PYCR2       | Q96C36     | 0.895993384       | 0.01616341 |
| PMPCA         | Q10713     | 1.093680399       | 0.0001752 | BAX         | Q07812     | 1.091957706       | 0.01621322 |
| UQCC1         | Q9NVA1     | 0.752057688       | 0.0005114 | NDUFA10     | Q95299     | 0.784537452       | 0.01685225 |
| ANK3          | Q12955     | 0.872760801       | 0.0006727 | RNF170      | Q96K19     | 0.845929171       | 0.01697735 |
| MT-ATP6       | P00846     | 0.818612245       | 0.0007649 | TMEM14C     | Q9P0S9     | 0.904122279       | 0.01784726 |
| PRMT5         | O14744     | 0.763243243       | 0.0008858 | PDXDC1      | Q6P996     | 1.302038012       | 0.01817852 |
| PISD          | Q9UG56     | 1.35160366        | 0.0009494 | LIG3        | P49916     | 1.718463445       | 0.01870091 |
| NDUFA11       | Q86Y39     | 0.79533129        | 0.0010876 | GARS1       | P41250     | 0.721143545       | 0.01875204 |
| RTN4IP1       | Q8WVVV3    | 0.790507005       | 0.0010884 | SLC30A5     | Q8TAD4     | 0.648037326       | 0.0192248  |
| APOL2         | Q9BQE5     | 1.8125            | 0.0012098 | IARS2       | Q9NSE4     | 0.760929729       | 0.02001179 |
| COQ5          | Q5HYK3     | 0.639601079       | 0.0012133 | MTOR        | P42345     | 0.81509434        | 0.02114274 |
| GABARAPL2     | P60520     | 1.478971963       | 0.0016325 | ERAP1       | Q9NZ08     | 0.933338556       | 0.02126    |
| MICU2         | Q8IYU8     | 1.24074393        | 0.0016719 | NDUFA12     | Q9UI09     | 0.788216426       | 0.02198759 |
| DTYMK         | P23919     | 0.742454136       | 0.0017567 | TM9SF2      | Q99805     | 0.834173792       | 0.02301564 |
| MIX23         | Q9JQ41     | 0.798353909       | 0.0017773 | ABC8        | Q9NUT2     | 1.083612814       | 0.02428979 |
| UQCRC         | O14949     | 0.825229035       | 0.0018405 | HLA-A       | Q53Z42     | 1.330183265       | 0.02437287 |
| COX18         | Q8N8Q8     | 1.510895472       | 0.0018741 | CLN5        | O75503     | 1.114444991       | 0.02446412 |
| CLCN5         | P51795     | 0.791392065       | 0.0020817 | PGS1        | Q32NB8     | 1.456483126       | 0.02514707 |
| MSM01         | Q15800     | 1.534944181       | 0.0021489 | MT-ND4      | P03905     | 0.736647999       | 0.02583178 |
| NDUF11        | O15239     | 0.745527113       | 0.0022267 | SEC24B      | O95487     | 0.826273885       | 0.02633618 |
| SYTL4         | Q96C24     | 1.322241406       | 0.0022308 | LMAN2L      | Q9H0V9     | 0.87846168        | 0.02650217 |
| OC1AD2        | Q56VL3     | 2.116402116       | 0.0023634 | CPOX        | P36551     | 0.874981385       | 0.02653792 |
| MCEE          | Q96PE7     | 0.880968651       | 0.0027022 | TRIP11      | Q15643     | 0.877745311       | 0.02700614 |
| UQCRC2        | P22695     | 0.819374135       | 0.0027047 | MT-ND5      | P03915     | 0.756728275       | 0.02782088 |
| CTSC          | P53634     | 0.74586269        | 0.0028152 | DHCR7       | Q9UBM7     | 1.154406356       | 0.0279679  |
| APOE          | P02649     | 1.918116976       | 0.0029208 | AIMP1       | Q12904     | 0.863011768       | 0.02822622 |
| GTPBP3        | Q969Y2     | 0.777683002       | 0.0029319 | SUPV3L1     | Q8IYB8     | 0.887411788       | 0.02844017 |
| MCCC2         | Q9HCC0     | 0.933081427       | 0.003059  | OAT         | P04181     | 1.720669201       | 0.0292547  |
| BST2          | Q10589     | 1.650746269       | 0.0031486 | PPOX        | P50336     | 0.754415195       | 0.02940751 |
| SIL1          | Q9H173     | 1.403764706       | 0.0040973 | MT-CO2      | P00403     | 0.856852216       | 0.02947087 |
| TMEM11        | P17152     | 0.807971014       | 0.0041418 | FN1         | P02751     | 0.595776031       | 0.03059181 |
| CDK16         | Q00536     | 0.895788789       | 0.0042373 | ATP5MJ      | A0A0A0MTQ5 | 0.844018447       | 0.03073883 |
| MT-ND2        | P03891     | 0.72949301        | 0.0043884 |             | F5H5T6     | 1.380514706       | 0.03150694 |
| SLC7A11       | Q9UYP5     | 0.508732978       | 0.0043932 | MICU1       | A0A0U1RRK1 | 1.141864814       | 0.03171816 |
| OCRL          | Q01968     | 0.720838124       | 0.004405  | OC1AD1      | Q9NX40     | 1.247997366       | 0.03217916 |
| NDUF2         | O95298     | 0.794526902       | 0.0044322 | EIF3A       | Q14152     | 0.799429507       | 0.03237866 |
| CST3          | P01034     | 1.494922139       | 0.0047487 | CTTN        | Q14247     | 1.619933749       | 0.03248963 |
| LRRRC8D       | Q7L1W4     | 0.829951691       | 0.0047643 | NDUF67      | P17568     | 0.870799448       | 0.03294738 |
| SLC25A16      | P16260     | 1.700980392       | 0.004872  | EC1         | P42126     | 0.705161252       | 0.03385329 |
| B4GAT1        | O43505     | 1.218878813       | 0.005197  | NBAS        | A2RRP1     | 0.887094786       | 0.0340257  |
| PARK7         | Q99497     | 0.821196581       | 0.0058193 | PLOD1       | Q02809     | 1.193676424       | 0.03434599 |
| CDK1          | P06493     | 1.220389015       | 0.0061841 | ATL3        | Q6DD88     | 0.873181759       | 0.03443278 |
| HADHB         | P55084     | 1.082789575       | 0.0062973 | FLNA        | P21333     | 1.483308629       | 0.03459456 |
| AP3D1         | O14617     | 0.912780269       | 0.0064598 | APOOL       | Q6UXV4     | 1.13953115        | 0.03504888 |
| SUCLG2        | Q96I99     | 0.942527588       | 0.0069314 | TFG         | Q92734     | 0.789585547       | 0.03510912 |
| FDF1          | P37268     | 2.298319672       | 0.0070343 | ISCU        | Q9H1K1     | 1.104905345       | 0.03517402 |
| BDH1          | Q02338     | 1.199078139       | 0.0072738 | TOMM70      | O94826     | 0.888693726       | 0.03528466 |
| COQ6          | Q9Y229     | 0.773358787       | 0.0076194 | NAA25       | Q14CX7     | 0.844070962       | 0.03560931 |
| UQCC2         | V5I9T4     | 0.745494741       | 0.0076643 | NDUF51      | P28331     | 0.760253326       | 0.03609751 |
| SUCLG1        | P53597     | 0.880879629       | 0.0079255 | GRPEL2      | Q8TAA5     | 0.759684607       | 0.03611999 |
| ABCE1         | P61221     | 0.797233837       | 0.0082222 | TXNRD2      | A0A182DWF2 | 0.840348384       | 0.03627015 |
| PC            | P11498     | 1.107594022       | 0.0093414 | ATP5MK      | Q96IX5     | 0.86239539        | 0.03735858 |
| SUCLA2        | A0A2R8Y6Y7 | 0.879236496       | 0.0098128 | CARD19      | Q96LW7     | 1.212962963       | 0.03738221 |
| NIF3L1        | Q9GZT8     | 0.830544747       | 0.0100185 | MSH6        | P52701     | 1.310607503       | 0.03826792 |
| LLGL1         | Q15334     | 0.921229492       | 0.0101264 | COQ7        | H3BP28     | 0.814505979       | 0.03832307 |
| ABC7          | O75027     | 1.155276785       | 0.0103018 | SIRT5       | Q9NXA8     | 0.882431828       | 0.03836766 |
| MT-ND6        | P03923     | 0.737964656       | 0.010419  | DNAJC11     | Q9NVH1     | 0.914288644       | 0.03850007 |
| TSN           | Q15631     | 0.808966074       | 0.0104996 | ZMPSTE24    | O75844     | 0.874137931       | 0.03908396 |
| COQ3          | Q9NZJ6     | 0.834023073       | 0.010562  | UQCRCB      | P14927     | 0.841400656       | 0.04042972 |
| RAB3D         | Q95716     | 1.357790428       | 0.010614  | MFF         | Q9GZY8     | 1.196742031       | 0.04065759 |
| DYNCDH1       | Q8NCM8     | 1.277268094       | 0.0107298 | ZW10        | O43264     | 0.881993569       | 0.0407004  |
| ATP6AP2       | A0A180GTB0 | 1.360764755       | 0.0107494 | GRPEL1      | Q9HAV7     | 1.115470974       | 0.04116106 |
| VRK1          | Q99986     | 1.443961885       | 0.0113724 | FECH        | P22830     | 0.838853031       | 0.04129133 |
| NADK2         | Q4G0N4     | 0.830400658       | 0.0113819 | HADHA       | HOYFD6     | 1.070906313       | 0.04162355 |
| PARP1         | P09874     | 1.773443089       | 0.01157   | GHITM       | Q9H3K2     | 1.132198953       | 0.04169004 |
| CDK5RAP2      | Q965N8     | 0.735040191       | 0.0116329 | CTSA        | P10619     | 1.108732222       | 0.0417012  |
| FKBP9         | O95302     | 1.272814793       | 0.0121078 | NUP210      | Q8TEM1     | 1.304665876       | 0.04192848 |
| NOA1          | Q8NC60     | 1.359159095       | 0.0121424 | SLC25A20    | O43772     | 1.158769426       | 0.04207959 |
| GP72          | Q8TD30     | 0.683488896       | 0.0122001 | SQLE        | Q14534     | 1.495143331       | 0.0423004  |
| TSFM          | P43897     | 0.892999979       | 0.0129092 | RACK1       | P63244     | 0.784912377       | 0.04235659 |
| GATM          | P50440     | 1.430699593       | 0.0131649 | TFB1M       | Q8WVVM0    | 1.175881443       | 0.04262367 |
| UQCRC1        | P31930     | 0.862318434       | 0.013178  | CPT1A       | P50416     | 1.190184987       | 0.04295446 |
| NDUF57        | F5H5N1     | 0.833272595       | 0.0132898 | NCLN        | Q969V3     | 0.940693797       | 0.04306423 |
| AARS1         | P49588     | 0.734503501       | 0.0134156 | SERPINH1    | P50454     | 1.166245346       | 0.04327213 |
| DYNLL1        | P63167     | 1.140525141       | 0.0134924 | CNP         | P09543     | 0.903667978       | 0.04493343 |
| RAB3B         | P20337     | 1.434664247       | 0.0135877 | ADH5        | P11766     | 0.873336772       | 0.04508755 |
| NUBPL         | Q8TB37     | 0.705690185       | 0.0135962 | HSPA9       | P38646     | 0.865413628       | 0.04529779 |
| GALNT2        | Q10471     | 0.788749088       | 0.0138681 | RIDA        | P52758     | 0.720510096       | 0.0454383  |
| SQOR          | Q9Y6N5     | 1.441088898       | 0.0142112 | NDUFV1      | G3V0I5     | 0.808518103       | 0.04577722 |
| SCD           | O00767     | 2.380105018       | 0.0142781 | USO1        | O60763     | 0.826526121       | 0.0460825  |
| BCKDK         | H3BS02     | 1.669776119       | 0.0146127 | QTRT2       | Q9H974     | 0.843821656       | 0.04639331 |
| DHRS1         | Q96LJ7     | 1.407354001       | 0.0147935 | COX15       | Q7KZN9     | 1.282993197       | 0.04713629 |
| NUMA1         | A0A087WY61 | 1.788034703       | 0.0150632 | HCCS        | P53701     | 1.198333333       | 0.04871752 |
| COL2A1        | P02458     | 1.513370119       | 0.0153484 | PDK1        | Q15118     | 0.808317268       | 0.04953672 |
| SYNJ2BP-COX16 | A0A087WYV9 | 1.255399629       | 0.0155042 |             |            |                   |            |

**A**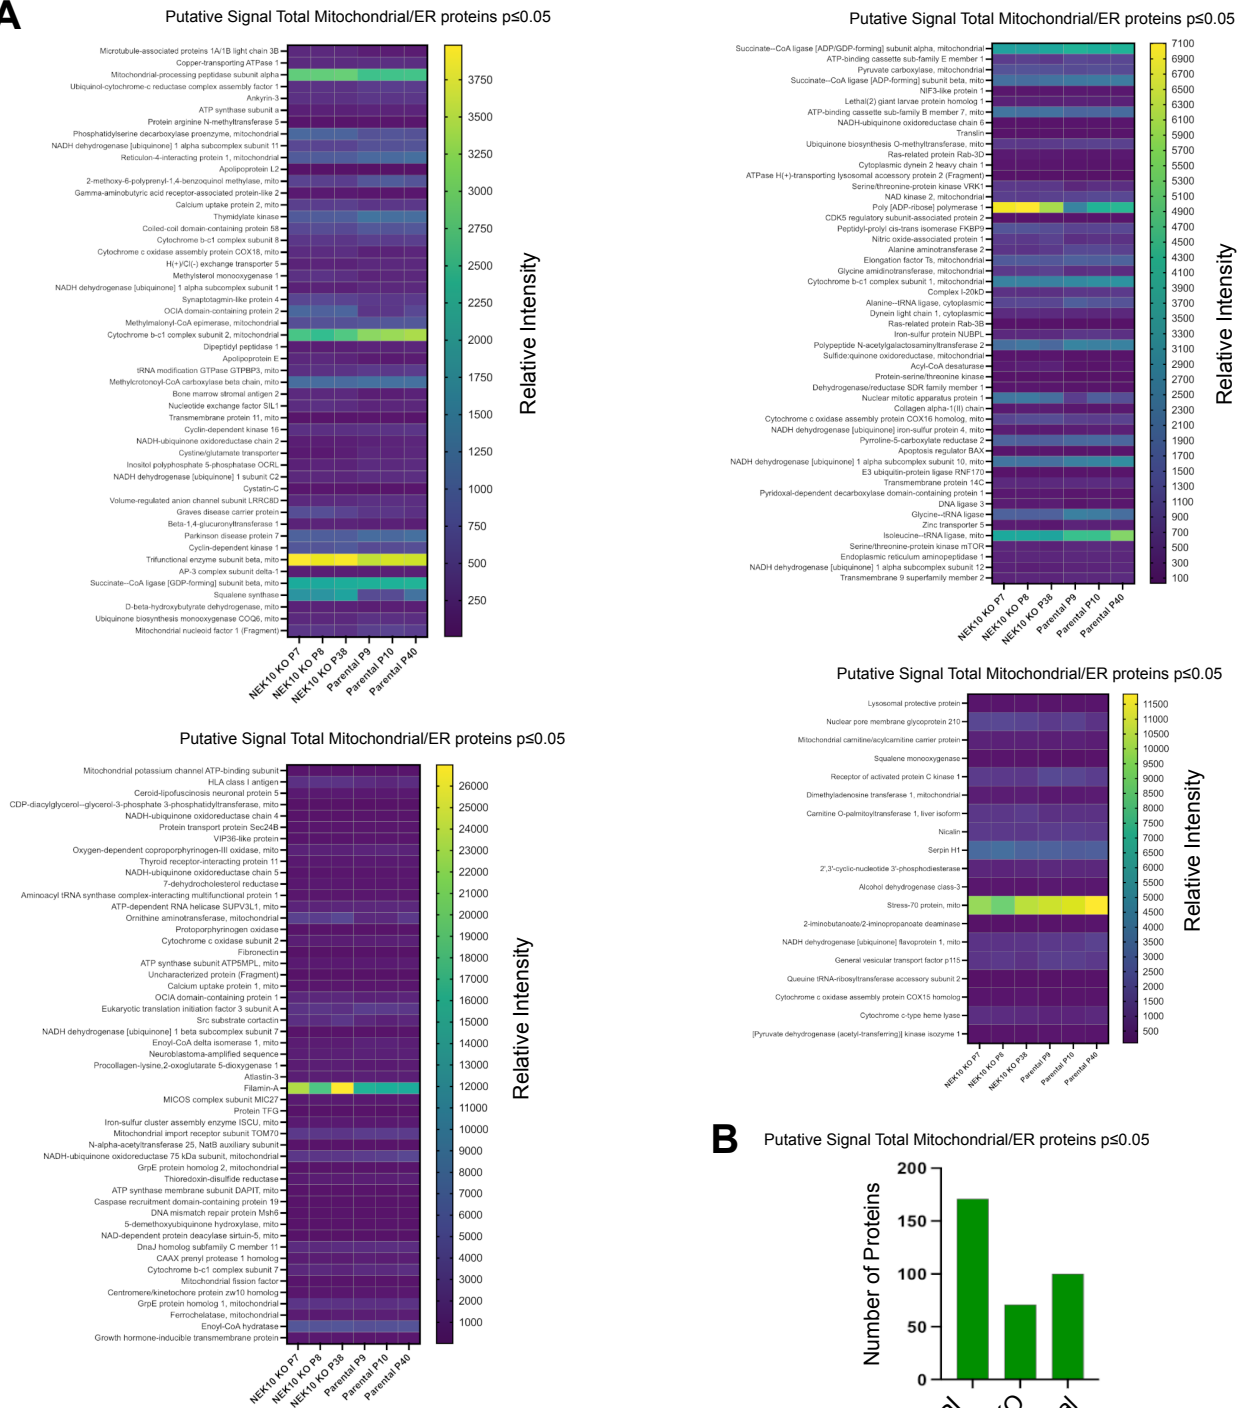

**Supplemental Figure S8. Putative signal of total mitochondrial and ER proteins from Parental and NEK10 KO cells.** A) Heat map of 171 putative signals of mitochondrial and ER proteins from NEK10 KO (p7, p8, p38) and Parental cells (p9, p10, p40). The putative signal found for total protein, with a p-value < 0.05, is shown. B) 100 (58.4%) of a total of 171 proteins have a putative protein signal higher in Parental cells than in NEK10 KO cells. And 41.6% of these proteins (71 proteins) have a higher putative total protein signal in NEK10 KO cells compared to Parental cells.



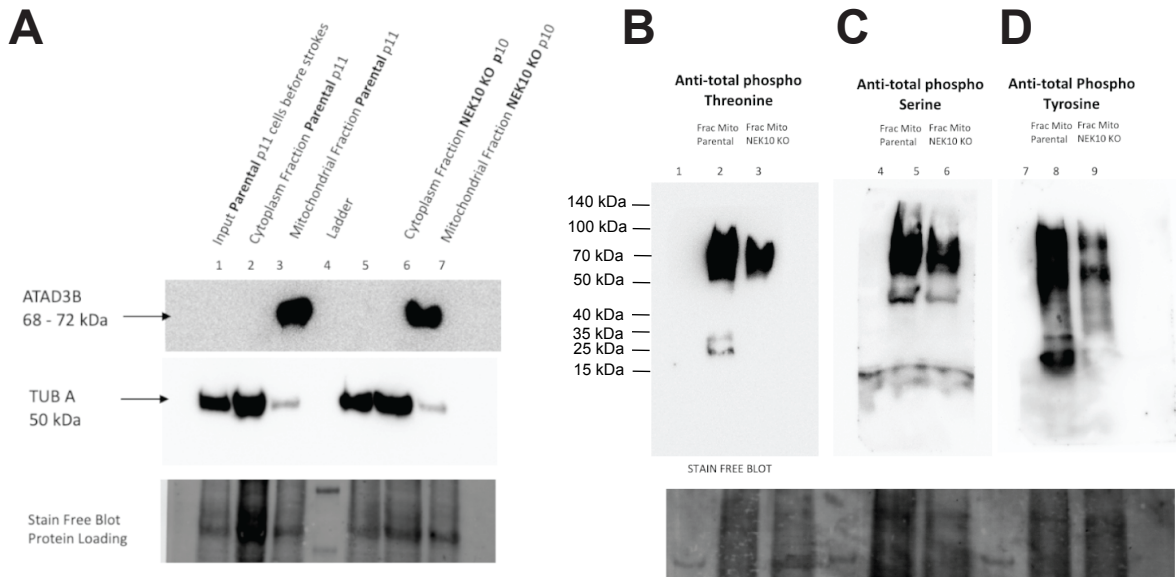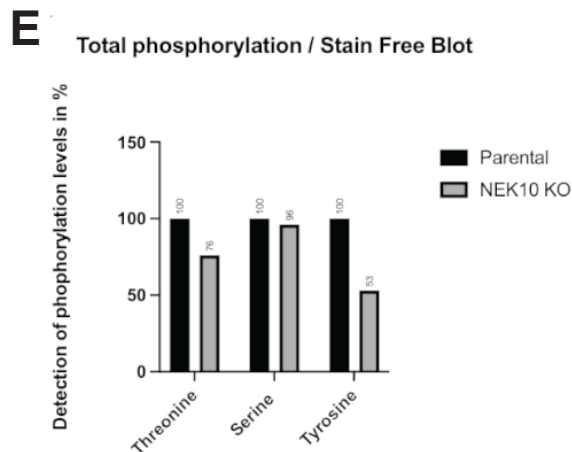

**Supplemental Figure S9. Analyses of phosphoproteins.** A) Crude mitochondrial fractionation of Parental cells passages p11 and NEK10 KO passage p10. The upper panel shows the western blotting analyzed with the anti-ATAD3 antibody. The middle panel shows western blotting analyzed with anti-Tubulin A antibody. Total protein analysis was detected by Bio-Rad Stain-Free Blot technique, lower panel. The protein molecular marker is Thermo Scientific Spectra™ Multicolor Broad Range Protein Ladder. B) Analysis was performed with the anti-total phosphothreonine antibody. C) Analysis with anti-total phosphoserine antibody. D) Analysis with anti-total phosphotyrosine antibody. Lanes 2, 5, and 8 are the crude mitochondrial fractions of Parental cells. Lanes 3, 6, and 9 are the crude mitochondrial fractions of NEK10 KO cells. In the lower panel is shown the total protein analysis detected by the Bio-Rad Stain-Free Blot. The protein molecular marker used in the blotting westerns was Thermo Scientific Spectra™ Multicolor Broad Range Protein Ladder. E) The representative graph of total threonine, serine, and tyrosine phosphorylation is presented in percentage of control. The intensity of the bands was quantified with Image J2. The Stain Free Blot was used as a phosphorylation intensity normalizer.

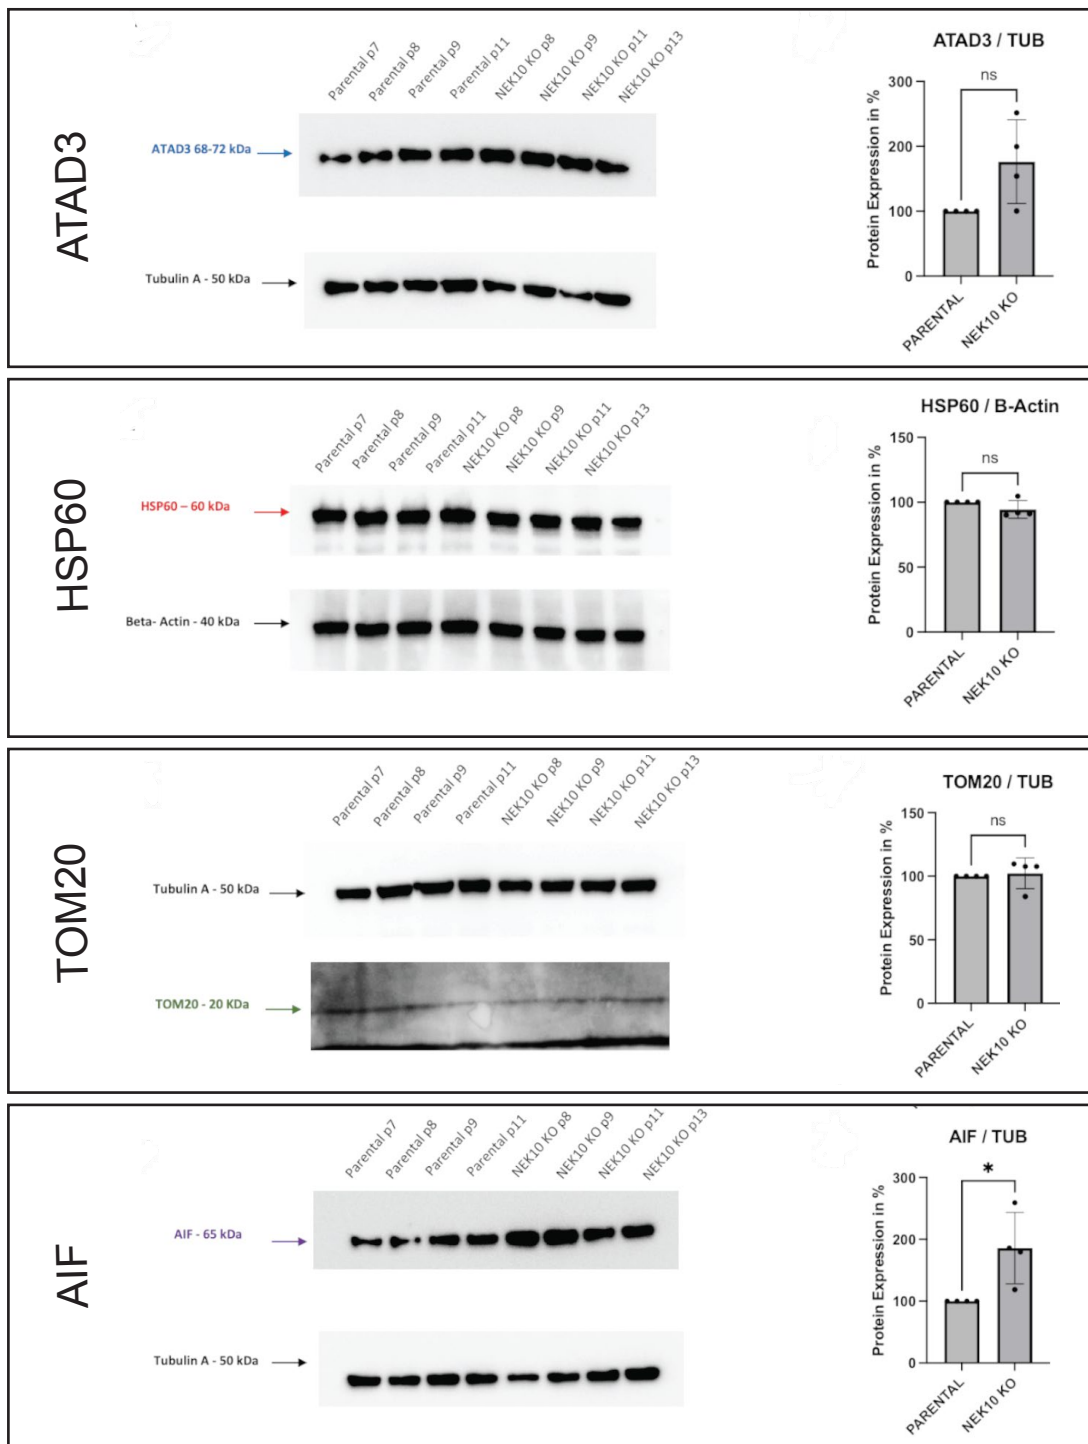

**Supplemental Figure S10 – Mitochondrial proteins levels of Parental and NEK10 KO cells.** The western blottings show the levels of ATAD3; HSP60; TOM20; AIF. The protein levels analysis in % is shown in graphs on the right of each blot, The Tubulin A or B-actin levels were used for protein levels normalization. The intensity of the bands was quantified with Image J2. The graphs show the result of n=4. The statistical analyses were performed with GraphPad Prism 4.7 employing paired t-test, where p-value <0.05 = \*, and p-value <0.01 = \*\*. The graphs are shown in Mean with SD.
